# Supplementary material for: Circulating Tumor Cell Count and Overall Survival in Patients With Metastatic Hormone-Sensitive Prostate Cancer
Source: PubMed Central journal article supplement (PMC11581504; doi:10.1001/jamanetworkopen.2024.37871), 2024-10-07
Supplement: jamanetwopen-e2437871-s001.pdf [file jamanetwopen-e2437871-s001.pdf]

## Supplemental Online Content

Goldkorn A, Tangen C, Plets M, et al. Circulating tumor cell count and overall survival in patients with metastatic hormone-sensitive prostate cancer. *JAMA Netw Open*. 2024;7(10):e2437871. doi:10.1001/jamanetworkopen.2024.37871

**eTable 1.** Odds Ratios for Clinical Covariates and Baseline CTC Count in a Multivariable Polytomous Logistic Regression Model Predicting PSA Response

**eTable 2.** Analysis of Baseline Covariate Distribution by Progression CTC Categories

**eFigure 1.** Baseline CTC Categories (0, 1-4,  $\geq 5$  CTCs), PSA Response, and Overall Survival by Treatment Arm

**eFigure 2.** Baseline CTC Categories (0, 1-4,  $\geq 5$  CTCs) and Progression-Free Survival by Treatment Arm

**eFigure 3.** Progression CTC Count ( $< 5$  CTCs,  $\geq 5$  CTCs) and Overall Survival (n = 93)

This supplemental material has been provided by the authors to give readers additional information about their work.

**eTable 1.** Odds Ratios for Clinical Covariates and Baseline CTC Count in a Multivariable Polytomous Logistic Regression Model Predicting PSA Response

|                                                                                          | No Response<br>(N=111) | Partial Response<br>(N=109)   | Complete Response<br>(N=283) |
|------------------------------------------------------------------------------------------|------------------------|-------------------------------|------------------------------|
| <b>Baseline CTC category</b>                                                             |                        |                               |                              |
| <b>0</b>                                                                                 | Ref                    | Ref                           | Ref                          |
| <b>1-4</b>                                                                               | Ref                    | 0.63 (0.32, 1.24)<br>p=0.18   | 0.58 (0.32, 1.05)<br>p=0.07  |
| <b>5+</b>                                                                                | Ref                    | 0.45 (0.21, 0.96)<br>p=0.03   | 0.26 (0.12, 0.54)<br>p<0.001 |
| <b>Treatment arm:<br/>Orteronel vs CAD</b>                                               | Ref                    | 0.55 (0.31, 0.97)<br>p=0.04   | 1.28 (0.78, 2.12)<br>p=0.33  |
| <b>Disease Severity:<br/>Extensive vs Minimal</b>                                        | Ref                    | 0.88 (0.48, 1.63)<br>p=0.68   | 0.57 (0.33, 0.98)<br>p=0.04  |
| <b>Age (years)</b>                                                                       | Ref                    | 0.99 (0.95, 1.02)<br>p=0.46   | 0.98 (0.95, 1.01)<br>p=0.28  |
| <b>Race: White vs Non-white</b>                                                          | Ref                    | 1.37 (0.62, 3.01)<br>p=0.44   | 1.19 (0.59, 2.39)<br>p=0.63  |
| <b>Alkphos (U/L)</b>                                                                     | Ref                    | 1.00 (1.00, 1.00)<br>p=0.54   | 1.00 (0.99, 1.00)<br>p=0.96  |
| <b>Hgb (g/dL)</b>                                                                        | Ref                    | 1.33, (1.13, 1.56)<br>p<0.001 | 1.32 (1.13, 1.53)<br>p<0.001 |
| <b>Baseline PSA* (ng/mL)</b>                                                             | Ref                    | 1.00 (1.00, 1.01)<br>p=0.21   | 0.99 (0.98, 1.00)<br>p=0.02  |
| <b>Bone Mets: Yes vs No</b>                                                              |                        | 1.45 (0.64, 3.30)<br>p=0.38   | 0.56 (0.28, 1.09)<br>p=0.09  |
| <b>Bone Pain: Yes vs No</b>                                                              | Ref                    | 0.60 (0.30, 1.20)<br>p=0.15   | 0.64 (0.35, 1.17)<br>p=0.15  |
| Treatment x Baseline CTC interaction not significant (p=0.15, 4 df residual chi-sq test) |                        |                               |                              |

**eTable 2.** Analysis of Baseline Covariate Distribution by Progression CTC Categories

|                                | Progression CTC categories<br>(N=93)** |              |       |
|--------------------------------|----------------------------------------|--------------|-------|
|                                | <5<br>(N=68)                           | ≥5<br>(N=25) | pval* |
| <b>Age (median yrs)</b>        | 68                                     | 66           | 0.79  |
| <b>Race: white (N, %)</b>      | 58 (85%)                               | 23 (92%)     | 0.40  |
| <b>Alk Phos (median U/L)</b>   | 94                                     | 147          | 0.06  |
| <b>Hgb (median g/dL)</b>       | 14.0                                   | 13.6         | 0.38  |
| <b>PSA (median ng/mL )</b>     | 58.7                                   | 57.2         | 0.87  |
| <b>Bone pain (N, %)</b>        |                                        |              |       |
| Yes                            | 16 (76%)                               | 5 (24%)      | 0.72  |
| No                             | 52 (72%)                               | 20 (28%)     |       |
| <b>Bone mets (N, %)</b>        |                                        |              |       |
| Yes                            | 49 (69%)                               | 22 (31%)     | 0.11  |
| No                             | 19 (86%)                               | 3 (14%)      |       |
| <b>Disease severity (N, %)</b> |                                        |              |       |
| Extensive                      | 37 (69%)                               | 17 (31%)     | 0.24  |
| Minimal                        | 31 (79%)                               | 8 (21%)      |       |

\*Kruskal-Wallis test for continuous covariates, Cochran-Mantel-Haenszel test for categorical covariates

\*\* N=32 submitted progression CTC sample but no baseline CTC sample; N=61 submitted both baseline and progression CTC samples

**eFigure 1.** Baseline CTC Categories (0, 1-4,  $\geq 5$  CTCs), PSA Response, and Overall Survival by Treatment Arm

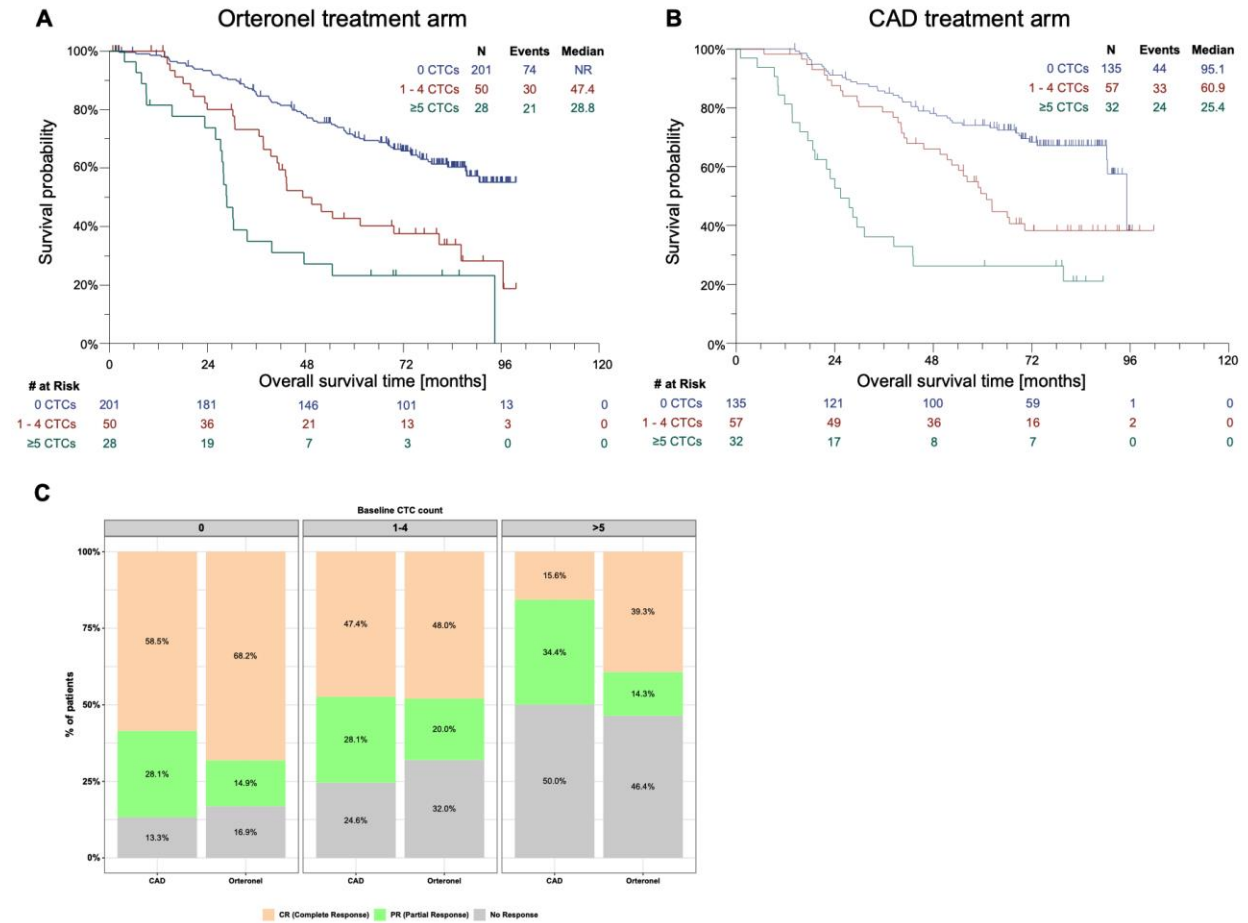

(A) Orteronel treatment arm of patients receiving Androgen deprivation therapy (ADT) and Orteronel (CYP17 inhibitor) or (B) CAD treatment arm (Combined Androgen Deprivation) of patients receiving ADT and bicalutamide. (C) Association of baseline CTC count categories (0 CTCs, 1-4 CTCs,  $\geq 5$  CTCs) with 7-month PSA response (No response, Partial Response, Complete Response) by treatment arms.

**eFigure 2.** Baseline CTC Categories (0, 1-4,  $\geq 5$  CTCs) and Progression-Free Survival by Treatment Arm

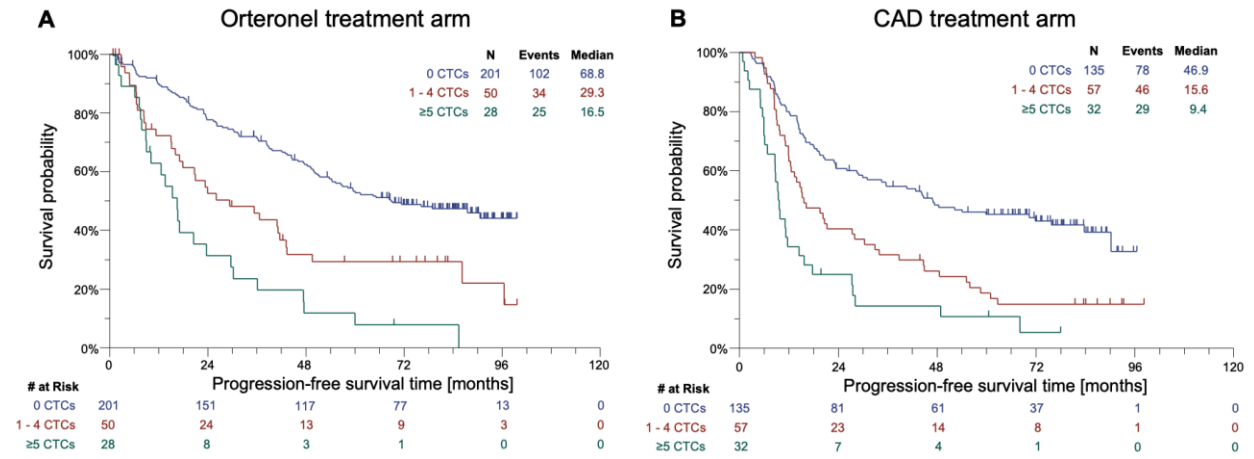

(A) Patients randomized to receive androgen deprivation therapy (ADT) and Orteronel or (B) Patients randomized to receive ADT and bicalutamide. Time (months) is defined from the date of treatment start to PFS event.

**eFigure 3.** Progression CTC Count (<5 CTCs, ≥5 CTCs) and Overall Survival (n = 93)

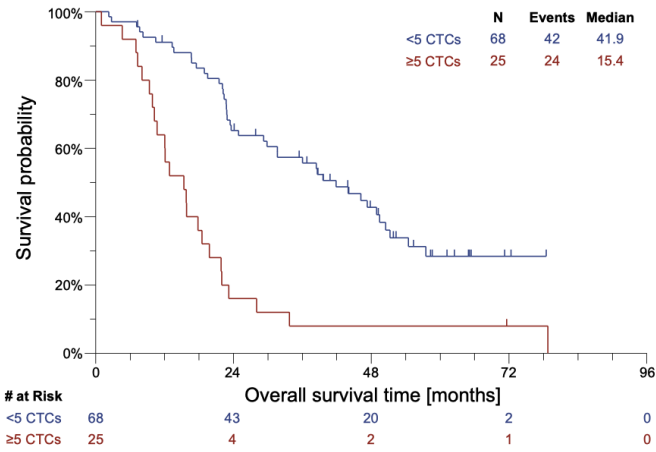

Kaplan-Meier curves by progression CTC categories (<5 and ≥5 CTCs), pooled across treatment arms.
